# TABLE OF CONTENTS

# ANESTHESIOLOGY

Volume 133

Issue 1

July 2020

|                                                  |     |
|--------------------------------------------------|-----|
| ◆ This Month in ANESTHESIOLOGY .....             | 1A  |
| Science, Medicine, and the Anesthesiologist..... | 13A |
| Infographics in Anesthesiology .....             | 17A |

## ◆ Editorials

### Uncertainty and Certainty

E. D. Kharasch ..... 1

### Goal-directed Therapy: Why Benefit Remains Uncertain

K. Maheshwari, D. I. Sessler ..... 5

### “Nonroutine Events” as a Nonroutine Outcome for Perioperative Systems Research

M. B. Lane-Fall, E. J. Bass ..... 8

### Anesthesia as Decoupling?

A. E. Hudson ..... 11

### Ketamine for Chronic Pain: Old Drug New Trick?

J. D. Clark ..... 13

### Balancing Supply and Demand for Blood during the COVID-19 Pandemic

E. A. Gehrie, S. M. Frank, S. M. Goobie ..... 16

## ■ Readers' Toolbox

### Manipulating Neural Circuits in Anesthesia Research

E. D. Melonakos, O. A. Moody, K. Nikolaeva, R. Kato,  
C. J. Nehs, K. Solt ..... 19

## Perioperative Medicine

### CLINICAL SCIENCE

#### ◆ ◆ Individualized Fluid Management Using the Pleth Variability Index:

##### ◆ A Randomized Clinical Trial

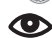

M.-O. Fischer, S. Lemoine, B. Tavernier, C.-E. Bouchakour, V. Colas,  
M. Houard, W. Greub, G. Daccache, C. Hulet, V. Compère, D. Taing,  
E. Lorne, J.-J. Parienti, J.-L. Hanouz, for the Optimization using the Pleth  
Variability Index (OPVI) Trial Group ..... 31

The investigators randomized 447 moderate-risk major arthroplasty patients to plethysmographic-guided *versus* routine fluid management. Fitness for discharge and actual hospital durations were essentially identical in each group. Complications were rare and similar in each group. Plethysmographic-guided fluid management did not reduce the duration of hospitalization or complications in moderate-risk surgery patients. *SUPPLEMENTAL DIGITAL CONTENT IS AVAILABLE IN THE TEXT*

#### ◆ ◆ Incidence and Classification of Nonroutine Events during

##### ◆ Anesthesia Care

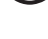

J. S. Liberman, J. M. Slagle, G. Whitney, M. S. Shotwell,  
A. Lorinc, E. Porterfield, M. B. Weinger ..... 41

Video recordings of 511 cases from 1998 to 2004 were viewed to identify nonroutine events, which occurred in 22% of cases, and some cases had multiple events. One in fifteen patients had events associated with some degree of patient injury. The most common contributory factors were related to provider, patient, or teaching/supervision. *SUPPLEMENTAL DIGITAL CONTENT IS AVAILABLE IN THE TEXT*

◆ Refers to This Month in ANESTHESIOLOGY

◆ Refers to Editorials

This article has an Audio Podcast

See Supplemental Digital Content

CME Article

This article has a Video Abstract

Part of the Letheon writing competition

This article has a Visual Abstract

Readers' Toolbox

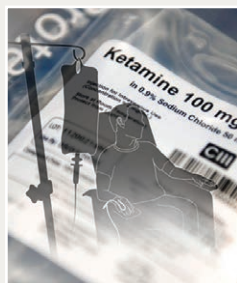

**ON THE COVER:** Ketamine is often used for the management of refractory chronic pain, yet there are few trials exploring its analgesic after intravenous administration or in association with magnesium. In this issue of ANESTHESIOLOGY, Pickering *et al.* report negligible effect of ketamine with or without magnesium 5 weeks after intravenous infusion. In an accompanying Editorial, Clark calls for de-emphasizing use of infused ketamine until and unless we can determine how to use the drug to benefit patients. Cover Illustration: S. M. Jarret, M.F.A., C.M.I. Photo: J. P. Rathmell.

- Pickering *et al.*: Ketamine and Magnesium for Refractory Neuropathic Pain: A Randomized, Double-blind, Crossover Trial, p. 154
- Clark: Ketamine for Chronic Pain: Old Drug New Trick? p. 13

- ◇ **Subcutaneous Nitroglycerin for Radial Arterial Catheterization in Pediatric Patients: A Randomized Controlled Trial**  
Y.-E. Jang, S.-H. Ji, E.-H. Kim, J.-H. Lee, H.-S. Kim,  
E. B. Mossad, J.-T. Kim .....53

In children less than 2 yr of age, infiltration around the radial artery with 5 mcg/kg of nitroglycerin in 0.5 ml of saline increased the first success rate of arterial cannulation.

- Magnesium and Bladder Discomfort after Transurethral Resection of Bladder Tumor: A Randomized, Double-blind, Placebo-controlled Study**  
J.-Y. Park, J. H. Hong, D.-H. Kim, J. Yu, J.-H. Hwang, Y.-K. Kim .....64

In a randomized trial of 120 patients recovering from transurethral resection of bladder tumor, intravenous magnesium substantially reduced discomfort with a number needed to treat of only 2. Intravenous magnesium is a simple and inexpensive way to reduce bladder discomfort.

- ◇ **Accuracy and Feasibility of Clinically Applied Frailty Instruments before Surgery: A Systematic Review and Meta-analysis**  
S. D. Aucoin, M. Hao, R. Sohi, J. Shaw, I. Bentov,  
D. Walker, D. I. McIsaac .....78

This meta-analysis of 45 articles identified that specific frailty scales may be better predictors for some adverse outcomes when compared to others. The Clinical Frailty Scale was most strongly associated with mortality and discharge not to home. The Edmonton Frail Scale was a better predictor of complications. The Frailty phenotype was most strongly associated with postoperative delirium. *SUPPLEMENTAL DIGITAL CONTENT IS AVAILABLE IN THE TEXT*

- ◇ **Risk Factors for Failure to Rescue in Myocardial Infarction after Noncardiac Surgery: A Cohort Study**  
S. Mazzarello, D. I. McIsaac, W. S. Beattie, D. A. Fergusson,  
M. M. Lalu .....96

In a multinational cohort of 8,923 patients experiencing perioperative myocardial infarction after intermediate to high-risk noncardiac surgery, one in five died within 30 days. Patients age 85 yr or older, and those with advanced systemic disease, underweight body mass index, ascites, disseminated cancer, sepsis, or dyspnea at rest were at highest risk. *SUPPLEMENTAL DIGITAL CONTENT IS AVAILABLE IN THE TEXT*

- An Effective and Efficient Testing Protocol for Diagnosing Iron-deficiency Anemia Preoperatively**  
O. Okocha, H. Dand, M. J. Avram, B.J. Sweitzer .....109

The investigators implemented a novel screening system in which anemia automatically triggered evaluation for iron deficiency using previously collected blood. The automated system identified iron-deficiency anemia far better than clinicians using normal procedures.

- Association between Use of Angiotensin-converting Enzyme Inhibitors or Angiotensin Receptor Blockers and Postoperative Delirium**  
E. Farag, C. Liang, E. J. Mascha, M. Y. Argalious, J. Ezell,  
K. Maheshwari, W. A. S. Esa, C. A. Troianos, D. I. Sessler .....119

In a single-center cohort study of adults admitted to a surgical intensive care unit, preoperative use of angiotensin-converting enzyme inhibitors or angiotensin receptor blockers was not associated with reduced postoperative delirium. However, rapidly starting angiotensin-converting enzyme inhibitors or angiotensin receptor blockers postoperatively was associated with reduced delirium.

## BASIC SCIENCE

- ◇ **Collapse of Global Neuronal States in *Caenorhabditis elegans* under Isoflurane Anesthesia**  
M. R. Awal, G. S. Wirak, C. V. Gabel, C. W. Connor .....133

*In vivo* imaging of neuronal network activity with single cell resolution in *Caenorhabditis elegans* reveals that although neurons display highly correlated activity in awake animals, this system-wide organization in neuronal activity is lost under isoflurane anesthesia. These observations at the single cell level in a complex neuronal network confirm previous electrophysiologic works suggesting functional disintegration of neuronal circuitry as a mechanism of anesthetic-induced unconsciousness. *SUPPLEMENTAL DIGITAL CONTENT IS AVAILABLE IN THE TEXT*

## Critical Care Medicine

### CLINICAL SCIENCE

- ◇ **Mechanical Ventilation Guided by Uncalibrated Esophageal Pressure May Be Potentially Harmful**  
G. Cammarota, G. Lauro, E. Santangelo, I. Squazzotti, R. Perucca,  
F. Verdina, E. Boniolo, R. Tarquini, E. Bignami, S. Mongodi, E. Arisi,  
A. Orlando, F. Della Corte, R. Vaschetto, F. Mojoli .....145

This study enrolled patients undergoing pelvic robotic surgery and found that esophageal balloon calibration significantly improved assessment of esophageal pressure when compared with the conventional uncalibrated approach to measuring esophageal pressure. *SUPPLEMENTAL DIGITAL CONTENT IS AVAILABLE IN THE TEXT*

## Pain Medicine

### CLINICAL SCIENCE

-  **Ketamine and Magnesium for Refractory Neuropathic Pain: A Randomized, Double-blind, Crossover Trial**  
G. Pickering, B. Pereira, V. Morel, A. Corrigan, F. Giron, F. Marcaillou, A. Bidar-Beauvallon, E. Chandeze, C. Lambert, L. Bernard, N. Delage .....154

Using a triple-crossover paradigm, saline, ketamine, and ketamine + magnesium infusions were given to a group of 20 patients with chronic neuropathic pain. No effect of either the ketamine or ketamine + magnesium in terms of pain relief over the 35 days after infusions was identified. Additional secondary health-related, emotional, sleep, and quality of life measures were also unchanged by the drug infusions. *SUPPLEMENTAL DIGITAL CONTENT IS AVAILABLE IN THE TEXT*

### BASIC SCIENCE

-  **Distinct Function of Estrogen Receptors in the Rodent Anterior Cingulate Cortex in Pain-related Aversion**  
K.-K. Zang, X. Xiao, L.-Q. Chen, Y. Yang, Q.-L. Cao, Y.-L. Tang, S.-S. Lv, H. Cao, L. Zhang, Y.-Q. Zhang .....165

Blockade of the estrogen receptor- $\beta$  but not the estrogen receptor- $\alpha$  reduced pain-related aversion in rats, a model of the affective components of pain. Administration of an estrogen receptor- $\beta$  agonist to the rostral anterior cingulate cortex caused conditioned place aversion without altering mechanical or thermal sensitivity. Estrogen receptor- $\beta$  may be a key receptor controlling the affective components of pain-related behaviors in laboratory models. *SUPPLEMENTAL DIGITAL CONTENT IS AVAILABLE IN THE TEXT*

-  **Neural Selective Cryoneurolysis with Ice Slurry Injection in a Rat Model**  
L. Garibyan, S. M. Tuchayi, Y. Wang, A. Khodorova, A. Stemmer-Rachamimov, M. Purschke, S. Osseiran, C. L. Evans, J. Mao, G. Strichartz, R. R. Anderson .....185

Using a rat sciatic nerve block model, an injectable biocompatible ice slurry preparation was shown to provide analgesic effects for at least 60 days. Disruption of myelin sheaths recovered by 112 days after injections, suggesting that the slurry-induced cryoneurolysis is reversible. Providing sustained analgesia using injected ice slurries may be possible. *SUPPLEMENTAL DIGITAL CONTENT IS AVAILABLE IN THE TEXT*

## Education

### IMAGES IN ANESTHESIOLOGY

-  **Bronchus Intermedius Compression from Idiopathic Thoracic Scoliosis**  
M. Atteri, C. Allphin, M. Mahmoud, M. S. Ok .....195  
*SUPPLEMENTAL DIGITAL CONTENT IS AVAILABLE IN THE TEXT*

### Bloody Cerebrospinal Fluid Drainage

A. J. Maurer, J. Kedrowski, R. Wardhan .....196

### Management of the Traumatic Airway Obstructed by Foreign Body

M. M. Hollon, M. Hunter, R. Johnson .....197

## ORIGINAL INVESTIGATION IN EDUCATION

### Stress Management Training Improves Overall Performance during Critical Simulated Situations: A Prospective Randomized Controlled Trial

F. Sigwalt, G. Petit, J.-N. Evain, D. Clavierie, M. Bui, A. Guinet-Lebreton, M. Trousselard, F. Canini, D. Chassard, A. Duclos, J.-J. Lehot, T. Rimmelé, M. Lilot .....198

Stress management training may improve performance among trainees subjected to a stressful simulated clinical environment.

## CLINICAL FOCUS REVIEW

-  **Patient Blood Management: Effectiveness and Future Potential**  
D. R. Spahn, M. Muñoz, A. A. Klein, J. H. Levy, K. Zacharowski .....212

Patient blood management is a highly successful and cost-effective concept that improves patient outcome by correction of anemia with hematinic medication and reduction of blood loss perioperatively by meticulous surgical techniques and individualized coagulation management.

-  **Assessing and Reversing the Effect of Direct Oral Anticoagulants on Coagulation**  
A. Langer, J. M. Connors .....223

This article presents a focused review of the available tests to assess the effect of direct oral anticoagulants on coagulation and the use of reversal agents in the perioperative setting for practicing anesthesiologists.

## MIND TO MIND

-  **An ER Doctor Finds His Daughter in Critical Condition**  
J. Nicely .....233

- Flying with a Compass: Goals of Care in the Perioperative Setting**  
T. Cushman, M. M. Treggiari .....235

## Correspondence

- Analysis of Laryngoscopy Attempts in Infants: Comment**  
B. Horvath .....237

- Analysis of Laryngoscopy Attempts in Infants: Reply**  
J. A. Gálvez, S. Acquah, L. Ahumada, L. Cai, M. Polanski, L. Wu, A. F. Simpaio, J. M. Tan, J. Wasey, J. E. Fiadjoe .....237

- Priming Cardiopulmonary Bypass in Pediatric Surgery: Comment**  
P. Van Der Linden, A. Blanche, D. Schmartz .....238

|                                                                   |     |
|-------------------------------------------------------------------|-----|
| <b>Priming Cardiopulmonary Bypass in Pediatric Surgery: Reply</b> |     |
| <i>A. Dieu, M. Momeni</i> .....                                   | 239 |

|                                                               |     |
|---------------------------------------------------------------|-----|
| <b>Practice Guidelines for Central Venous Access: Comment</b> |     |
| <i>G. S. Shrestha</i> .....                                   | 241 |

|                                                                                                                                                                                 |     |
|---------------------------------------------------------------------------------------------------------------------------------------------------------------------------------|-----|
| <b>Practice Guidelines for Central Venous Access: Reply</b>                                                                                                                     |     |
| <i>J. L. Apfelbaum, S. M. Rupp, A. Tung, R. T. Connis,</i><br><i>on behalf of the American Society of Anesthesiologists Task</i><br><i>Force on Central Venous Access</i> ..... | 242 |

|                                                       |     |
|-------------------------------------------------------|-----|
| <b>Perioperative Neurocognitive Disorder: Comment</b> |     |
| <i>G. Giordano, F. Pugliese, F. Bilotta</i> .....     | 243 |

|                                                     |     |
|-----------------------------------------------------|-----|
| <b>Perioperative Neurocognitive Disorder: Reply</b> |     |
| <i>R. G. Eckenhoff, M. F. Eckenhoff</i> .....       | 243 |

|                                                                                                                       |     |
|-----------------------------------------------------------------------------------------------------------------------|-----|
| <b>Setup of a Dedicated Coronavirus Intensive Care Unit:<br/>Logistical Aspects</b>                                   |     |
| <i>F. Mojoli, S. Mongodi, G. Grugnetti, A. Muzzi, F. Baldanti,</i><br><i>R. Bruno, A. Triarico, G. A. Iotti</i> ..... | 244 |

|                                                                                                                                          |  |
|------------------------------------------------------------------------------------------------------------------------------------------|--|
| <b>Emergency Open-source Three-dimensional Printable Ventilator<br/>Circuit Splitter and Flow Regulator during the COVID-19 Pandemic</b> |  |
|------------------------------------------------------------------------------------------------------------------------------------------|--|

|                                                               |     |
|---------------------------------------------------------------|-----|
| <i>B. K. Lai, J. L. Erian, S. H. Pew, M. S. Eckmann</i> ..... | 246 |
|---------------------------------------------------------------|-----|

|                                                                                |     |
|--------------------------------------------------------------------------------|-----|
| <b>Rapid COVID-19-related Clinical Adaptations and<br/>Unanticipated Risks</b> |     |
| <i>C. R. Schrock, M. C. Montana</i> .....                                      | 248 |

|                         |     |
|-------------------------|-----|
| <b>Retraction</b> ..... | 249 |
|-------------------------|-----|

|                      |     |
|----------------------|-----|
| <b>Erratum</b> ..... | 250 |
|----------------------|-----|

## Anesthesiology Reflections from the Wood Library-Museum

|                                                             |    |
|-------------------------------------------------------------|----|
| <b>The Surgeon As "Swindler": A Corny Use of Chloroform</b> |    |
| <i>Jane S. Moon and George S. Bause</i> .....               | 40 |

|                                                                                              |    |
|----------------------------------------------------------------------------------------------|----|
| <b>Shadowing the Abbot: Wood Library-Museum Graphic<br/>Illustrators Bill and Janet Lyle</b> |    |
| <i>George S. Bause</i> .....                                                                 | 63 |

|                                                                                                    |    |
|----------------------------------------------------------------------------------------------------|----|
| <b>Aftershocks for Quake-rattled Frueh: Dan "Wood's Local<br/>Anaesthetic" Levels Its Namesake</b> |    |
| <i>Melissa L. Coleman and George S. Bause</i> .....                                                | 95 |

|                                                                                               |     |
|-----------------------------------------------------------------------------------------------|-----|
| <b>Byline Backstory No. 6: Ethereal Inspirations in<br/>Scotland— Particular Then General</b> |     |
| <i>George S. Bause</i> .....                                                                  | 184 |

|                                   |     |
|-----------------------------------|-----|
| <b>Careers &amp; Events</b> ..... | 19A |
|-----------------------------------|-----|

## INSTRUCTIONS FOR AUTHORS

The most recently updated version of the Instructions for Authors is available at [www.anesthesiology.org](http://www.anesthesiology.org). Please refer to the Instructions for the preparation of any material for submission to ANESTHESIOLOGY.

Manuscripts submitted for consideration for publication must be submitted in electronic format via Editorial Manager (<https://www.editorialmanager.com/aln>). Detailed directions for submission and the most recent version of the Instructions for Authors can be found on the Journal's Web site (<http://www.anesthesiology.org>). Books and educational materials for review should be sent to Alan Jay Schwartz, M.D., M.S.Ed., Director of Education, Department of Anesthesiology and Critical Care Medicine, The Children's Hospital of Philadelphia,

**ANESTHESIOLOGY** (ISSN 0003-3022) is published monthly by Wolters Kluwer Health, Inc., 14700 Citicorp Drive, Bldg 3, Hagerstown, MD 21742. Business office: Two Commerce Square, 2001 Market Street, Philadelphia, PA 19103. Periodicals postage paid at Hagerstown, MD, and at additional mailing offices. Copyright © 2020, the American Society of Anesthesiologists, Inc. All Rights Reserved.

**Annual Subscription Rates:** *United States*—\$1026 Individual, \$2451 Institution, \$413 In-training. *Rest of World*—\$1082 Individual, \$2721 Institution, \$413 In-training. Single copy rate \$245. Subscriptions outside of North America must add \$57 for airfreight delivery. Add state sales tax, where applicable. The GST tax of 7% must be added to all orders shipped to Canada (Wolters Kluwer Health, Inc.'s GST Identification #895524239, Publications Mail Agreement #1119672). Indicate in-training status and name of institution. Institution rates apply to libraries, hospitals, corporations, and partnerships of three or more individuals. Subscription prices outside the United States must be prepaid. Prices subject to change without notice. Subscriptions will begin with currently available issue unless otherwise requested. Visit us online at [www.lww.com](http://www.lww.com).

Individual and in-training subscription rates include print and access to the online version. Online-only subscriptions for individuals (\$339) and persons in training (\$339) are available to nonmembers and may be ordered by downloading a copy of the Online Subscription FAXback Form from the Web site, completing the information requested, and faxing the completed form to 301-223-2400. Institutional rates are for print only; online subscriptions are available via Ovid. Institutions can choose to purchase a print and online subscription together for a discounted rate. Institutions that wish to purchase a print subscription, please contact Wolters Kluwer Health, Inc., 14700 Citicorp Drive, Bldg 3, Hagerstown, MD 21742; phone: 800-638-3030; fax: 301-223-2400. Institutions

34th Street and Civic Center Blvd., Room 9327, Philadelphia, Pennsylvania 19104-4399. Article-specific permission requests are managed with Copyright Clearance Center's Rightslink service. Information can be accessed directly from articles on the journal Web site. More information is available at <http://anesthesiology.pubs.asahq.org/public/rightsandpermissions.aspx>. For questions about the Rightslink service, e-mail [customer-care@copyright.com](mailto:customer-care@copyright.com) or call 877-622-5543 (U.S. only) or 978-777-9929. Advertising and related correspondence should be addressed to Advertising Manager, ANESTHESIOLOGY, Wolters Kluwer Health, Inc., Two Commerce Square, 2001 Market Street, Philadelphia, Pennsylvania 19103 (Web site: <http://www.wkadcenter.com>). Publication of an advertisement in ANESTHESIOLOGY does not constitute endorsement by the Society or Wolters Kluwer Health, Inc. of the product or service described therein or of any representations made by the advertiser with respect to the product or service.

that wish to purchase an online subscription or online with print, please contact the Ovid Regional Sales Office near you or visit [www.ovid.com/site/index.jsp](http://www.ovid.com/site/index.jsp) and select Contact and Locations.

**Address for non-member subscription information, orders, or change of address** (except Japan): Wolters Kluwer Health, Inc., 14700 Citicorp Drive, Bldg 3, Hagerstown, MD 21742; phone: 800-638-3030; fax: 301-223-2400. In Japan, contact Wolters Kluwer Health Japan Co., Ltd., Forecast Mita Building 5th floor, 1-3-31 Mita Minato-ku, Tokyo, Japan 108-0073; phone: +81 3 5427 1969.

**Address for member subscription information, orders, or change of address:** Members of the American Society of Anesthesiologists receive the print and online journal with their membership. To become a member or provide a change of address, please contact the American Society of Anesthesiologists, 1061 American Lane, Schaumburg, Illinois 60173-4973; phone: 847-825-5586; fax: 847-825-1692; e-mail: [membership@ASAHQ.org](mailto:membership@ASAHQ.org). For all other membership inquiries, contact Wolters Kluwer Health, Inc., Customer Service Department, P.O. Box 1610, Hagerstown, MD 21740; phone: 800-638-3030; fax: 301-223-2400.

**Postmaster:** Send address changes to ANESTHESIOLOGY, P.O. BOX 1610, Hagerstown, MD 21740.

**Advertising:** Please contact Hilary Druker, National Account Manager, Health Learning, Research & Practice, Medical Journals, Wolters Kluwer Health, Inc.; phone: 609-304-9187; e-mail: [Hilary.Druker@wolterskluwer.com](mailto:Hilary.Druker@wolterskluwer.com). For classified advertising: Dave Wiegand, Recruitment Advertising Representative, Wolters Kluwer Health, Inc.; phone: 847-361-6128; e-mail: [Dave.Wiegand@wolterskluwer.com](mailto:Dave.Wiegand@wolterskluwer.com).
